# Supplementary material
Source: MDPI journal article supplement (https://www.mdpi.com/2073-4344/12/9/1034)
Supplement: s1 [file s1]

## Supplementary Information

### Effect of morphology-dependent oxygen vacancies of CeO<sub>2</sub> on the catalytic oxidation of toluene

Ahmed Ismail <sup>a</sup>, Muhammad Zahid <sup>a</sup>, Boren Hu <sup>a</sup>, Adnan Khan <sup>b</sup>, Nauman Ali <sup>b\*</sup>, Yujun Zhu <sup>a,\*</sup>

<sup>a</sup> Key Laboratory of Functional Inorganic Material Chemistry, Ministry of Education of the People's Republic of China, Heilongjiang University, Harbin 150080, China.

<sup>b</sup> Institute of Chemical Sciences, University of Peshawar, Peshawar 25120, Pakistan.

\*Corresponding Authors: E-mail address: nali75pk@uop.edu.pk (N.A.);

yujunzhu@hlju.edu.cn (Y.Z.)

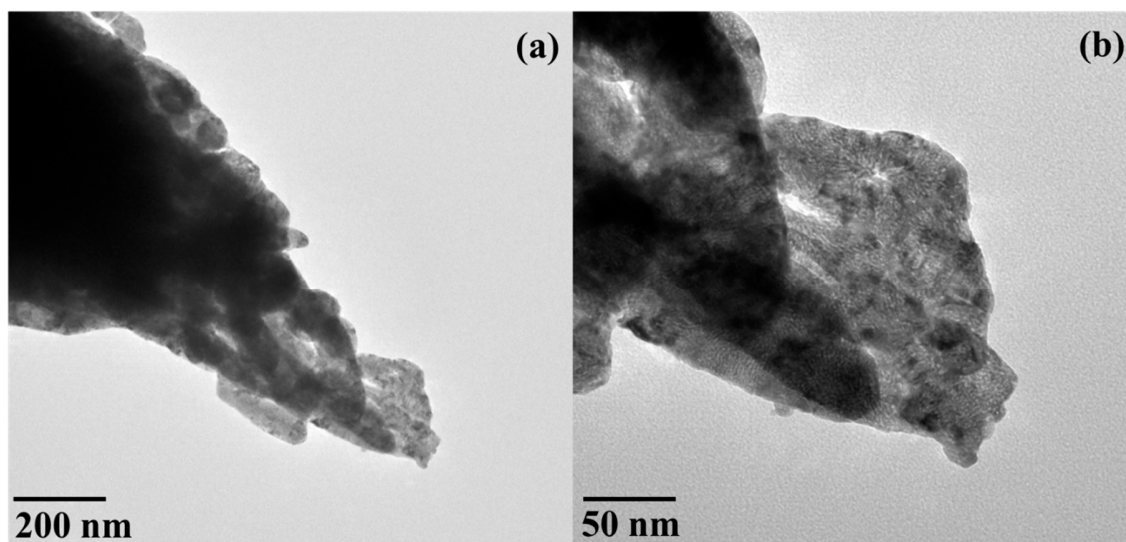

**Figure S1.** HRTEM images of nanorod segment of CeO<sub>2</sub> (S) (a and b).

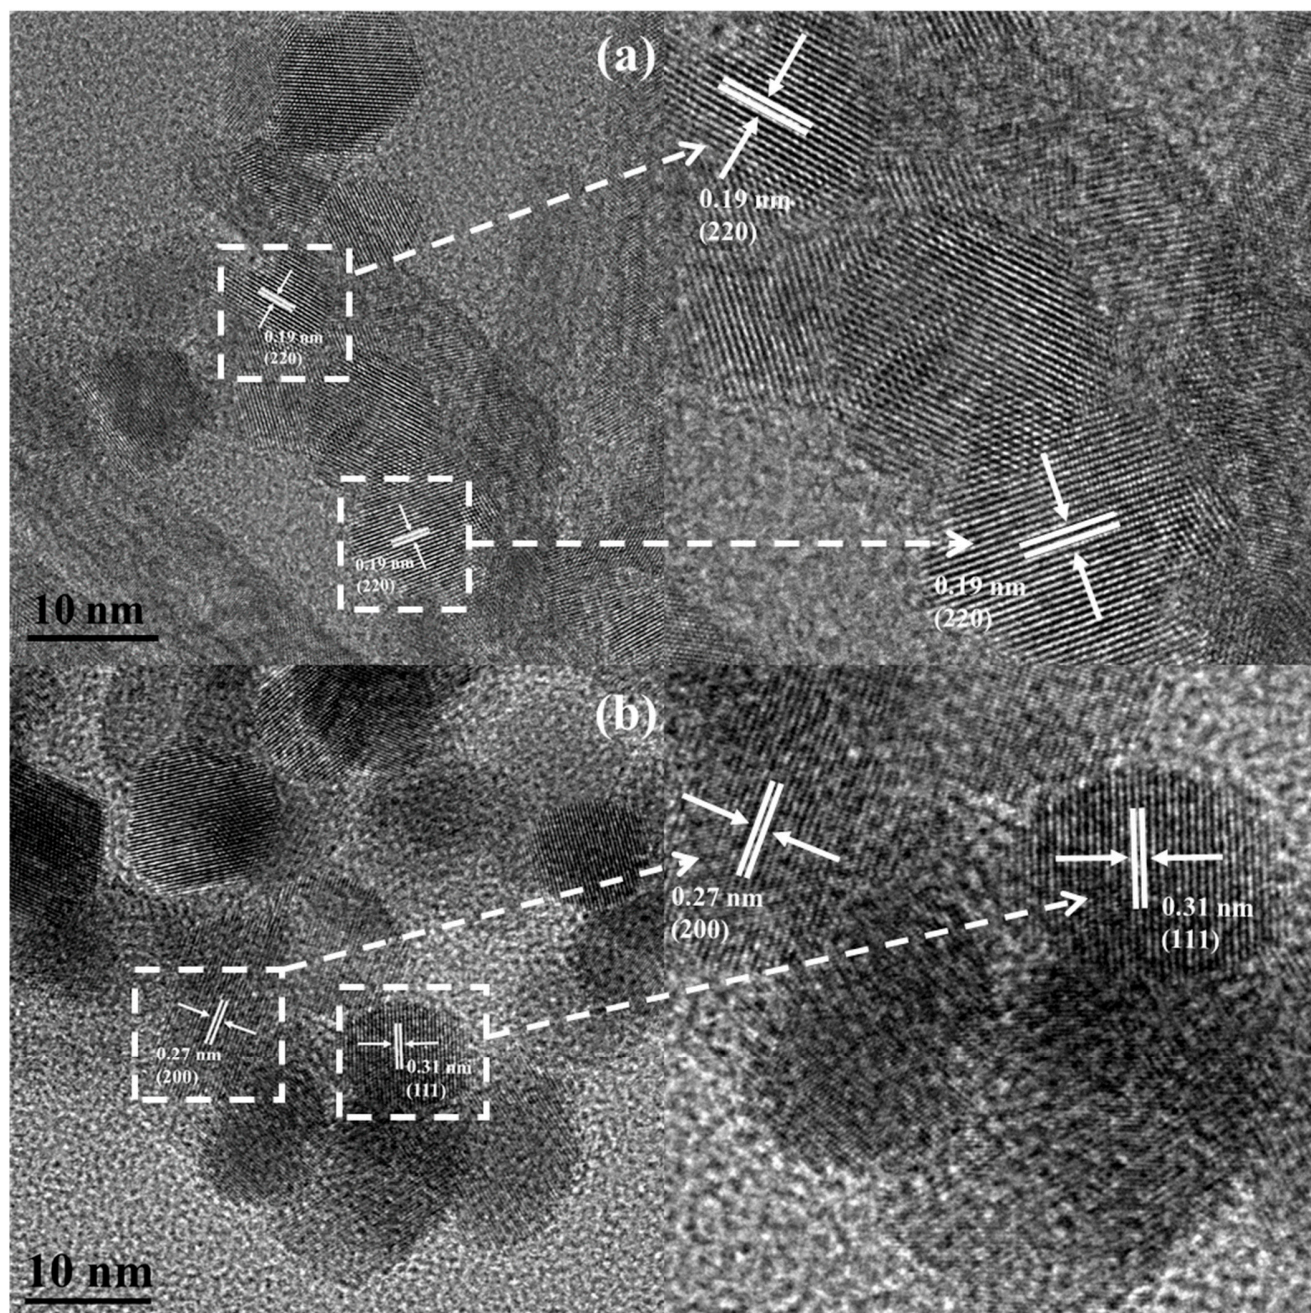

**Figure S2.** HRTEM images of CeO<sub>2</sub> (R) (a) and CeO<sub>2</sub> (P) (b).
